# Supplementary material for: Diagnostic value of partial exome sequencing in developmental disorders
Source: PLoS One. 2018 Aug 9;13(8):e0201041. doi: 10.1371/journal.pone.0201041 (PMC6084857; doi:10.1371/journal.pone.0201041)
Supplement: S2 Table — (*) Despite the clinically suspected mosaic condition, only blood derived DNA was available for the analysis. This might be a reason for the negative test results. (**) The recently described causative gene KMT2A is not covered by TS1. (***) The diagnosis was confirmed by targeted microarray that revealed a deletion of exon 1 in LIS1. (XLSX) [file pone.0201041.s002.xlsx]

## Sheet: Tabelle2
	Cohort	Solved cases	Detection rate
Whole cohort	106 index patients	36 index patients	n = 36 / 106 (34.0%), (CI 25.04% - 43.80%)
Average age	6.8 years	6.0 years
Female	n = 47 / 106 (44.3%), (CI 35.24% - 53.83%)	n = 19 / 36 (52.7%) (CI 37.00% - 68.02%)	n = 19 / 47 (40.4%), (CI 27.62% – 54.68%)
Male	n = 59 / 106 (55.7%), (CI 46.17% – 64.76%)	n = 17 / 36 (47.2%) (31.98% - 63.00%)	n = 17 / 59 (28.8%), (CI 18.77% – 41.45%)
ID	n = 98 / 106 (92.5%), CI (85.61% - 96.33%)	n = 33 / 36 (91.7%), (CI 77.43% - 97.87%)	n = 33 / 89 (33.7%), (CI 25.07% - 43.51%)
Mild ID	n = 18 / 106 (17.0%), (CI 10.93% - 25.34%)	n = 8 / 36 (22.2%), (CI 11.47% – 38.33%)	n = 8 / 18 (44.4%), (CI 24.54% – 66.30%)
Moderate ID	n = 38 / 106 (35.8%), (CI 27.35% - 45.34%)	n = 10 / 36 (27.8%), (CI 15.70% - 44.14%)	n = 10 / 38 (26.3%), (CI 14.81% – 42.17%)
Severe ID	n = 42 / 106 (39.6%), (CI 30.82% - 49.15%)	n = 15 / 36 (41.7%), (CI 27.12% - 57.82%)	n = 15 / 42 (35.7%), (CI 22.94% – 50.88%)
Other symptoms (than ID)
Facial anomaly	n = 71 / 106 (67.0%), (CI 57.55% - 75.22%)	n = 26 / 36 (72.22%), (CI 55.86% - 84.30%)	n = 26 / 71 (36.6%), (CI 26,35% – 48.26%)
Major anomaly	n = 72 / 106 (67.9%), (CI 58.52%) – 76.07%)	n = 23 / 36 (63.9%), (CI 47.52% - 77.58%)	n = 23 / 72 (31.9%), (CI 22.29% – 43.43%)
Brain malformation	n = 34 / 106 (32.1%), (CI 23.93% – 41.48%)	n = 12 / 36 (33.3%), (CI 20.14% – 49.74%)	n = 12 / 34 (35.3%), (CI 21.42% – 52.15%)
Abnormal body measurements	n = 67 / 106 (63.2%), (CI 53.70% – 71.79%)	n = 21 / 36 (58.3%), (CI 42.18% - 72.88%)	n = 21 / 67 (31.3%), (CI 21.46% – 43.25%)
Seizures	n = 31 / 106 (29.2%), (CI 21.40% - 38.50%)	n = 7 / 36 (19.4%), (CI 9.45% – 35.33%)	n = 7 / 31 (22.5%), (CI 11.11% – 40.10%)
Neurologic features other than seizures	n = 20 / 106 (18.9%), (CI 12.48% - 27.43%)	n = 7 / 36 (19.4%), (CI 9.45% – 35.33%)	n = 7 / 20 (35.0%), (CI 15.39% – 59.22%)
Heart defects	n = 18 / 106 (17.0%), (CI 10.93% – 25.34%)	n = 7 / 36 (19.4%), (CI 9.45% – 35.33%)	n = 7 / 18 (38.9%), (CI 20.23% – 61.46%)
Syndromic	n = 98 / 106 (92.5%), (CI 85.61% - 96.33%)	n = 34 / 36 (94.4%), (CI 80.91% - 99.41%)	n = 34 / 98 (34.7%), (CI 25.99% – 44.55%)
Patients with specific prelimary clinical diagnosis	n = 20 / 106 (18.9%), (CI 12.48% - 27.43%)	n = 11 / 36 (30.6%), (CI 17.89% - 46.97%)	n = 11 / 20 (55.0%), (CI 34.19% - 74.19%)
Confirmed by NGS	n = 5 / 20 (25%), (CI 8.41% - 39.58%)	n = 5 / 36 (13.8%), (CI 5.61% - 29.13%)
Unconfirmed by NGS	n = 15 / 20 (75%), (CI 52.75% - 89.19%)	n = 6 / 36 (16.7%), (CI 7.49% - 32.27%)	n = 6 / 15 (40.0%), (CI 19.75% - 64.33%)
Coffin-Siris Syndrom	n = 3	n = 3 (1x confirmed, 2x MED13L syndrome)
Kabuki syndrome	n = 3	n = 1 (confirmed)
Aicardi-Goutieres	n = 1	n = 1 (confirmed)
Neu-Laxova syndrome	n = 1	n = 1 (confirmed)
Stickler-syndrome	n = 1	n = 1 (alpha-Mannosidosis)
Lesch-Nyhan syndrome	n = 1	n = 1 (Phosphoribosylpyrophosphate synthetase superactivity )
PIK3CA related somatic overgrowth, differential diagnosis: NF1	n = 1	n = 1 (confirmed: Neurofibromatosis type 1)
Cornelia de lange syndrome	n = 1	n = 1 (Rett syndrome)
Baraitser-Winter syndrome	n = 1	n = 1 (Geleophysic dysplasia 1 )
Kleefstra syndrome	n = 1	0
Escobar syndrome	n = 1	0
Cutis marmorata-teleangiectatica congenita, Klippel-Trénaunay-Weber syndrome, mosaicism (PIK3CA, PIK3R2, AKT3)*	n = 1	0
Wiedemann-Steiner syndrome**	n = 1	0
FLNA-associated syndrome	n = 1	0
Macrocephaly capillary malformation syndrome*	n = 1	0
LIS1 related Lissencephaly***	n = 1	0
Patients with unspecific preliminary clinical diagnosis	n = 19 / 106 (17.9%), (CI 11.70% - 26.39%)	n = 4 / 36 (11.1%), (CI 3.82% - 25.91%)	n = 4 / 19 (21.1%), (CI 7.95% - 43.89%)
Epileptic encephelopathy	n = 7	n = 2 (1x Pontocerebellar hypoplasia type 6, 1x Baraitser-Winter syndrome 2 )	n = 2 / 7 (28.6%), (CI 7.56% - 64.76%)
Congenital microcephaly	n = 2	n = 1 (White-Sutton syndrome)
Ito syndrome*	n = 2	0
FG syndome	n = 1	n = 1 (X-linked mental retardation (DLG3))
Mitrochrondrial disease	n = 1	0
Rett syndrome	n = 1	0
Bialteral perisylvian polymicrogyria	n = 1	0
Hydrops fetalis	n = 2	0
Dubowitz syndrome	n = 1	0
Occipital Encephalocele, ciliopathy	n = 1	0
