# Supplementary material for: Diagnostic value of partial exome sequencing in developmental disorders
Source: PLoS One. 2018 Aug 9;13(8):e0201041. doi: 10.1371/journal.pone.0201041 (PMC6084857; doi:10.1371/journal.pone.0201041)
Supplement: S7 Table — (XLSX) [file pone.0201041.s007.xlsx]

## Sheet: Tabelle1
Patient-ID	Sex	Gene	Variant description	Genomic position (gh19)	Zygosity	Inheritance	Evaluation	ACMG criteria	Disease inheritance	Disease (OMIM)	gnomAD MAF	gnomAD het count	gnomAD hom count
#49	female	CEP152	NM_014985.3: c.2878T>C, p.Trp960Arg	chr15:g.49048567A>G	heterozygous	maternal	uncertain significance	PP3, BS1	autosomal recessive	Seckel syndrome/ Primary autosomal recessive microcephaly	0.26%	673	2
#71	male	NEB	NM_001164507.1: c.3986A>C, p.Asp1329Ala	chr2:g.152530992T>G	heterozygous	unknown	uncertain significance	PM2, PP3, BS1	autosomal recessive	Nemaline myopathy	0.096%	265	0
		NUBPL	NM_001201573.1: c.257T>C, p.Val86Ala	chr14:g.32257017T>C	heterozygous	unknown	uncertain significance	PM2, PP3	autosomal recessive	Mitochondrial complex I deficiency	0.26%	730	1
#72	female	RELN	NM_005045.3: c.4904T>G, p.Met1635Arg	chr7:g.103206703A>C	heterozygous	maternal	uncertain significance	PM2, PP3, BP1	autosomal recessive	Lissencephaly 2 (Norman-Roberts type) (autosomal recessive)/ Familial temporal lobe epilepsy (autosomal dominant)	0.00072%	2	0
		WDR62	NM_173636.4: c.1031G>A, p.Gly344Asp	chr19:g.36562606G>A	heterozygous	paternal	uncertain significance	PM2	autosomal recessive	Primary autosomal recessive microcephaly, with or without cortical malformations	0.0033%	9	0
#73	female	WDR62	NM_001083961: c.3306G>T, p.Gln1102His	chr19:g.36593724G>T	heterozygous	unknown	uncertain significance	PM2	autosomal recessive	Primary autosomal recessive microcephaly, with or without cortical malformations	0.0032%	1	0
#74	female	POMT2	NM_013382.5: c.1870C>T, p.Arg624Trp	chr14:g.77746187G>A	heterozygous	unknown	uncertain significance	PM2	autosomal recessive	Congential muscular dystrophy-dystroglycanopathy type A,type B (limb girlde) and type C	0.0020%	5	0
		LAMA2	NM_000426.3: c.1634T>A, p.Leu545Gln	chr6:g.129513850T>A	heterozygous	unknown	uncertain significance	PP3, BS1, BP6	autosomal recessive	Congential merosin-deficient muscular dystrophy/ Congeital muscular dystrophy due to partial LAMA2 deficiency	0.31%	851	1
#36	female	GLDC	NM_000170.2: c.73G>C, p.Gly25Arg	chr9:g.6645427C>G	heterozygous	unknown	uncertain significance	PM2, BP4	autosomal recessive	Glycine encephalopathy	0	0	0
		PC	NM_001040716: c.3208C>T, p.Arg1070Trp	chr11:g.66616781G>A	heterozygous	unknown	uncertain significance	PM2, PP2, PP3	autosomal recessive	Pyruvate carboxylase deficiency	0.0022%	6	0
		ALDH5A1	NM_170740.1: c.50C>T, p.Ser17Leu	chr6:g.24495274C>T	heterozygous	unknown	uncertain significance	PM2, BP4	autosomal recessive	Succinic semialdehyde dehydrogenase deficiency	0.0087%	3	0
#10	male	MCPH1	NM_001172574.1: c.1027C>T, p.Leu343Phe	chr8:g.6302270C>T	heterozygous	unknown	uncertain significance	PM2, BP5	autosomal recessive	Primary autosomal recessive microcephaly	0.00041%	1	0
#40	female	PHKB	NM_000293.2: c.39G>A, p.Trp13*	chr16:g.47495300G>A	heterozygous	unknown	uncertain significance	PVS1, BS1	autosomal recessive	Phosphorylase kinase deficienty of liver and muscle	0.25%	684	4
